# Supplementary material
Source: PubMed Central journal article supplement (PMC3960761)
Supplement: ajcei0003-0043-f6.pdf [file ajcei0003-0043-f6.pdf]

## Immunosensitization of BRAFi-resistant melanoma by HDACi

**Supplemental Table 1.** Differential expression of apoptotic genes in (A) M238(VemR1) and M238(VemR2) and (B) and their regulation by SAHA as measured by real time qPCR analysis using apoptosis gene arrays (representative of two independent experiments, genes with > 2.5 fold mRNA changes are considered significant)

| A. M238(VemR1) and M238(VemR2) compared to M238 |                                            | M238(VemR1) vs<br>M238                | M238(VemR2) vs<br>M238 |       |
|-------------------------------------------------|--------------------------------------------|---------------------------------------|------------------------|-------|
| Gene name                                       |                                            | Fold mRNA change                      |                        |       |
| DNA damage                                      | CIDEA (CIDE-A)                             | 12.85                                 | 17.4                   |       |
|                                                 | CIDEB                                      | -4.17                                 | -4.68                  |       |
| Other                                           | GADD45A (RP5-975D15.1, DDIT1, GADD45)      | -7.67                                 | -8.41                  |       |
| Antiapoptosis                                   | AKT1 (AKT, PKB, RAC)                       | -9.1                                  | -11.78                 |       |
|                                                 | BAG1 (RP11-326F20.2, BAG-1, HAP)           | -3.79                                 | -6.06                  |       |
|                                                 | BAG3 (BAG-3, BIS, CAIR-1)                  | -5.51                                 | -6.21                  |       |
|                                                 | BAG4 (BAG-4, SODD)                         | -5.99                                 | -6.67                  |       |
|                                                 | BCL2L1 (RP5-857M17.3, BCL-XL/S, BCL2L)     | 2.79                                  | 3.14                   |       |
|                                                 | BCL2L2 (BCL-W, BCL2-L-2, BCLW)             | -6.04                                 | -6.95                  |       |
|                                                 | BIRC3 (AIP1, API2, CIAP2)                  | 3.93                                  | 3.58                   |       |
|                                                 | BIRC8 (ILP-2, ILP2, hILP2)                 | 6.7                                   | 7.35                   |       |
|                                                 | BNIP1 (TRG8, NIP1, SEC20)                  | -6.25                                 | -5.1                   |       |
|                                                 | BNIP2 (BNIP-2, NIP2)                       | -6.72                                 | -8.49                  |       |
|                                                 | BNIP3 (NIP3)                               | -2.76                                 | -2.93                  |       |
|                                                 | DAPK1 (DAPK)                               | 3.36                                  | 3.21                   |       |
|                                                 | FAS (RP11-399O19.7, ALPS1A, APO-1)         | -3.41                                 | -4.46                  |       |
|                                                 | MCL1 (BCL2L3, EAT, MCL1-ES)                | -4.15                                 | -4.73                  |       |
|                                                 | NAIP (BIRC1, NLRB1, PSINAIP)               | -3.41                                 | -5.15                  |       |
|                                                 | RIPK2 (WUGSC:H_RG437L15.1, CARD3, CARDIAK) | -3.57                                 | -3.99                  |       |
|                                                 | XIAP (RP1-315G1.5, API3, BIRC4)            | -4.71                                 | -5.36                  |       |
|                                                 | Negative regulation                        | BCL10 (RP11-234D19.2, CARMEN, CIPER)  | -3.02                  | -3.66 |
|                                                 |                                            | DFFA (H13, DFF-45, DFF1)              | -3.95                  | -4.89 |
| TP53 (BCC7, LFS1, P53)                          |                                            | -4.07                                 | -4.4                   |       |
| TP73 (P73)                                      |                                            | 3.35                                  | 2.46                   |       |
| Positive regulation                             | ABL1 (RP11-83J21.1, ABL, JTK7, BCR/ABL)    | -2.62                                 | -3.06                  |       |
|                                                 | BAD (BBC2, BCL2L8)                         | -6.39                                 | -10.39                 |       |
|                                                 | BAK1 (BAK, BAK-LIKE, BCL2L7)               | -5.05                                 | -6.67                  |       |
|                                                 | BAX (BCL2L4)                               | -6.15                                 | -8.16                  |       |
|                                                 | BCLAF1 (BTF, BK211L9.1)                    | -4.68                                 | -7.67                  |       |
|                                                 | BID (FP497)                                | -2.47                                 | -3.22                  |       |
|                                                 | CD70 (CD27L, CD27LG, TNFSF7)               | -6.46                                 | -5.9                   |       |
|                                                 | FADD (GIG3, MORT1)                         | -12.13                                | -14.8                  |       |
|                                                 | HRK (DP5, HARAKIRI)                        | 4.34                                  | 3.04                   |       |
|                                                 | NOD1 (CARD4, CLR7.1, NLRC1)                | -2.68                                 | -2.89                  |       |
|                                                 | PYCARD (ASC, CARD5, TMS)                   | 10.06                                 | 9.33                   |       |
|                                                 | TP53BP2 (53BP2, ASPP2, BBP)                | -3.13                                 | -3.96                  |       |
|                                                 | TRAF2 (MGC:45012, TRAP, TRAP3)             | -8.5                                  | -10.23                 |       |
|                                                 | TRAF3 (CAP-1, CAP1, CD40BP)                | -4.2                                  | -4.99                  |       |
|                                                 | TRAF4 (ICE, IL1BC, P45)                    | -4.13                                 | -4.04                  |       |
|                                                 | TNF/TNFR Domain Proteins                   | CD40 (BP50, CDW40, TNFRSF5)           | 5.4                    | 5.91  |
|                                                 |                                            | TNFSF10 (APO2L, APO-2L, CD253, TRAIL) | 16.95                  | 3.98  |
|                                                 |                                            | TNFSF8 (CD153, CD30L, CD30LG)         | 2.55                   | 2.89  |
|                                                 |                                            | TNFRSF9 (4-1BB, CD137, CDW137)        | 6.15                   | 7.22  |
| BIR Domain Proteins                             | BIRC2 (API1, HIAP2, HIAP-2)                | -3.93                                 | -4.98                  |       |
| Death domain Proteins                           | TNFRSF10B (DR5, CD262, KILLER)             | -7.41                                 | -7.34                  |       |
|                                                 | TNFRSF11B (OCIF, OPG, TR1)                 | -1.87                                 | -3.71                  |       |
|                                                 | TNFRSF1A (CD120A, PPF, MS5)                | -6.16                                 | -8.53                  |       |
|                                                 | TNFRSF21 (UNQ437/PRO868, BM-018, CD358)    | -8.54                                 | -7.86                  |       |
|                                                 | TNFRSF25 (RP4-650H14.2, APO-3, DDR3)       | 2.55                                  | 1.59                   |       |
| TRADD (HS.89862)                                | -3.49                                      | -4.73                                 |                        |       |

## Immunosensitization of BRAFi-resistant melanoma by HDACi

|          |                                      |                                |        |       |
|----------|--------------------------------------|--------------------------------|--------|-------|
| Caspases | CASP1 (ICE, IL1BC, P45)              | 6.67                           | 5.03   |       |
|          | CASP10 (ALPS2, FLICE2, MCH4)         | 4.94                           | 4.62   |       |
|          | CASP2 (CASP-2, ICH1, NEDD-2)         | -15.96                         | -24.81 |       |
|          | CASP3 (CPP32, CPP32B, SCA-1)         | -6.64                          | -9.21  |       |
|          | CASP6 (MCH2)                         | -7.54                          | -12.73 |       |
|          | CASP7 (RP11-211N11.6, CASP-7, CMH-1) | -4.53                          | -3.7   |       |
|          | CASP9 (RP11-265F14.3, APAF-3, APAF3) | -2.98                          | -3.89  |       |
|          | Caspase activators                   | APAF1 (APAF-1, CED4)           | -5.58  | -5.95 |
|          |                                      | CARD8 (CARDINAL, DACAR, DAKAR) | -3.6   | -4.91 |

### B. M238(VemR1) + SAHA and M238(VemR2) + SAHA compared to M238(VemR1) and M238(VemR2)

|                                         | Gene name                               | M238 (VemR1)                   | M238 (VemR2)           |
|-----------------------------------------|-----------------------------------------|--------------------------------|------------------------|
|                                         |                                         | + SAHA vs M238 (VemR1)         | + SAHA vs M238 (VemR2) |
|                                         |                                         | Fold mRNA change               |                        |
| DNA damage                              | CIDEA (CIDE-A)                          | -4.42                          | 1.44                   |
|                                         | CIDEB                                   | 3.18                           | 3.21                   |
| Other                                   | GADD45A (RP5-975D15.1, DDIT1, GADD45)   | 3.24                           | 3.65                   |
| Antiapoptosis                           | AKT1 (AKT, PKB, RAC)                    | 10.33                          | 13.51                  |
|                                         | BAG3 (BAG-3, BIS, CAIR-1)               | 4.6                            | 5.03                   |
|                                         | BAG4 (BAG-4, SODD)                      | 3                              | 2.51                   |
|                                         | BCL2A1 (ACC-1, ACC-2, BCL2L5)           | 2.96                           | 2.02                   |
|                                         | BCL2L2 (BCL-W, BCL2-L-2, BCLW)          | 3.56                           | 3.77                   |
|                                         | BIRC3 (AIP1, API2, CIAP2)               | -8.76                          | -17.8                  |
|                                         | BNIP1 (TRG8, NIP1, SEC20)               | 2.72                           | 2.17                   |
|                                         | BNIP2 (BNIP-2, NIP2)                    | 3.27                           | 4.32                   |
|                                         | BNIP3L (BNIP3A, NIX)                    | 1.61                           | 2.61                   |
|                                         | Negative regulation                     | TP53 (BCC7, LFS1, P53)         | 1.92                   |
| Positive regulation                     | ABL1 (RP11-83J21.1, ABL, JTK7, BCR/ABL) | 2.08                           | 2.53                   |
|                                         | BAD (BBC2, BCL2L8)                      | 5.84                           | 8.23                   |
|                                         | BAK1 (BAK, BAK-LIKE, BCL2L7)            | 3.93                           | 4.55                   |
|                                         | BAX (BCL2L4)                            | 5                              | 5.9                    |
|                                         | CD70 (CD27L, CD27LG, TNFSF7)            | 4.33                           | 4.8                    |
|                                         | FADD (GIG3, MORT1)                      | 9.53                           | 11.23                  |
|                                         | HRK (DP5, HARAKIRI)                     | -2.05                          | 3.15                   |
|                                         | TRAF2 (MGC,45012, TRAP, TRAP3)          | 3.27                           | 3.61                   |
|                                         | TRAF4 (ICE, IL1BC, P45)                 | 4.44                           | 5.07                   |
|                                         | Death domain proteins                   | TNFRSF10B (DR5, CD262, KILLER) | 4                      |
| TNFRSF11B (OCIF, OPG, TR1)              |                                         | -2.39                          | -2.63                  |
| TNFRSF21 (UNQ437/PRO868, BM-018, CD358) |                                         | 4.98                           | 5.79                   |
| Caspases                                | CASP2 (CASP-2, ICH1, NEDD-2)            | 6.4                            | 9.26                   |
|                                         | CASP3 (CPP32, CPP32B, SCA-1)            | 2.85                           | 3.63                   |
|                                         | CASP6 (MCH2)                            | 3.72                           | 6.91                   |
|                                         | CASP7 (RP11-211N11.6, CASP-7, CMH-1)    | 2.69                           | 1.84                   |
|                                         | CASP9 (RP11-265F14.3, APAF-3, APAF3)    | 2.38                           | 3.34                   |
|                                         | CFLAR (CASH, CASP8AP1, CLARP)           | -5.03                          | -4.31                  |
|                                         | Caspase activators                      | APAF1 (APAF-1, CED4)           | 6                      |
